# Supplementary material for: A Pilot Study on Initial Stimulation Parameters for Neuroprosthetic Electrical Stimulation to Enhance Kinesthetic Sensation in Paretic Fingers of Patients with Chronic Hemiplegia
Source: Research Square preprint supplement (doi:10.21203/rs.3.rs-5119273/v1), 2024-10-23
Supplement: Supplementary file 1 [file dbe75d0845a5f0f08ef1cefb.pdf]

Table1: Characteristics of Subjects

|                       | Hemiplegic subjects (n=11) |      |
|-----------------------|----------------------------|------|
|                       | Mean                       | SD   |
| Age(years)            | 68.8                       | 11.6 |
| Gender(%male)         | 36.4                       |      |
| Height(cm)            | 148.5                      | 13.3 |
| Weight(kg)            | 53.0                       | 7.6  |
| BMI                   | 24.3                       | 3.9  |
| Severity of paralysis | Br. stage Hand 2—4         |      |

Br stage : Brunstrom stage

Table 2 : Friedman test results for maximum extension angle of the wrist joint and pain during electrical stimulation (n=11)

|                                                      | Frequency | Median | Mean Rank | Chi-square | p-value |
|------------------------------------------------------|-----------|--------|-----------|------------|---------|
| Maximum<br>extension angle of<br>the wrist joint (°) | 35Hz      | 25.83  | 1.75      | 1.500      | 0.472   |
|                                                      | 70Hz      | 28.31  | 2.13      |            |         |
|                                                      | 120Hz     | 27.90  | 2.13      |            |         |
| Pain                                                 | 35Hz      | 3.50   | 1.69      | 3.652      | 0.161   |
|                                                      | 70Hz      | 5.00   | 2.06      |            |         |
|                                                      | 120Hz     | 5.00   | 2.25      |            |         |

\*P value statistically significant at the  $P < 0.05$

Table 3 : The outcome of whether participants answered that they might be able to move their paralyzed hand, in relation to the frequency during electrical stimulation and other frequencies (Chi-square test results)

| Frequency | Movement (Yes) | Movement (No) | Chi-Square | p-value |
|-----------|----------------|---------------|------------|---------|
| 35Hz      | 3              | 8             | 11.727     | 0.003   |
| 70Hz      | 9              | 2             |            |         |
| 120Hz     | 10             | 1             |            |         |

Movement (Yes)” indicates the number of respondents who answered ‘can move’ and ‘cannot move’. Movement (No) is the number of respondents who answered “cannot move.

Table 4 : The association between the binary conditions for whether or not the participants answered that they might be able to move their paralyzed hand, with the variables dichotomized using the median, and the outcome presented using Chi-square test results and Bayesian factor

| Factor(Median)                                    | Chi-Square ( $\chi^2$ ) Value | Chi-Square p-value | Bayesian BF <sub>10</sub> | Posterior Mean (95% CI) |
|---------------------------------------------------|-------------------------------|--------------------|---------------------------|-------------------------|
| BMI(23.5)                                         | 0.020                         | 0.887              | 0.733                     | 0.196 (-2.34, 2.74)     |
| Skeletal Muscle Mass(22.1)                        | 0.020                         | 0.887              | 0.733                     | 0.205 (-2.37, 2.77)     |
| Body Fat Percentage (33.0)                        | 2.037                         | 0.154              | 1.467                     | -1.698 (-4.766, 1.37)   |
| Months Since Onset(69.0)                          | 0.020                         | 0.887              | 0.733                     | 0.013 (0.00, 0.02)      |
| Age(67.0)                                         | 0.020                         | 0.887              | 0.733                     | 0.187 (-2.36, 2.73)     |
| Severity of hand paralysis ( 4)                   | 0.196                         | 0.658              | 0.786                     | 0.621 (-1.93, 3.18)     |
| Maximum Frequency(3.0)                            | 2.037                         | 0.154              | 1.467                     | -1.708 (-4.79, 1.38)    |
| Maximum extension angle of the wrist joint (38.8) | 2.933                         | 0.087              | 2.200                     | 2.142 (-0.99, 5.27)     |

\*P value statistically significant at the P<0.05

The values in parentheses represent the 95% Confidence Interval (95% CI).

Table5 : Intersection of Stable Movement and Tolerable Pain by Frequency in Each Case

| ID | Severi<br>ty of<br>hand<br>paraly<br>sis | 35H<br>z<br>Pain | 70H<br>z<br>Pain | 120H<br>z<br>Pain | 35Hz<br>Moveme<br>nt | 70Hz<br>Moveme<br>nt | 120Hz<br>Moveme<br>nt | Intersectio<br>n (Pain +<br>Movement<br>) |
|----|------------------------------------------|------------------|------------------|-------------------|----------------------|----------------------|-----------------------|-------------------------------------------|
| 1  | 4                                        |                  | X                | X                 |                      | X                    | X                     | 70Hz,120Hz                                |
| 2  | 4                                        | X                | X                |                   |                      |                      | X                     |                                           |
| 3  | 3                                        | X                |                  |                   |                      |                      |                       |                                           |
| 4  | 4                                        | X                |                  |                   |                      | X                    | X                     | 70Hz                                      |
| 5  | 4                                        | X                | X                |                   |                      | X                    |                       |                                           |
| 6  | 3                                        | X                |                  |                   |                      | X                    | X                     |                                           |
| 7  | 4                                        |                  |                  |                   |                      |                      | X                     | 70Hz                                      |
| 8  | 3                                        | X                | X                |                   |                      | X                    |                       |                                           |
| 9  | 2                                        | X                | X                | X                 |                      | X                    |                       |                                           |
| 10 | 4                                        | X                | X                | X                 |                      | X                    | X                     | 70Hz,120Hz                                |
| 11 | 4                                        | X                | X                | X                 |                      |                      | X                     | 120Hz                                     |

X for pain means the mean value is less than NRS 7.

X for Movement means the variance of the extension angle is less than 1 Standard Diviation.

The intersection is represented by " X" frequencies for both pain and movement.

Severity of hand paralysis means Br.stage of hand
